# Supplementary material
Source: PubMed Central journal article supplement (PMC10330212)
Supplement: NIHMS1896264-supplement-1.pdf [file NIHMS1896264-supplement-1.pdf]

## Supplementary Material:

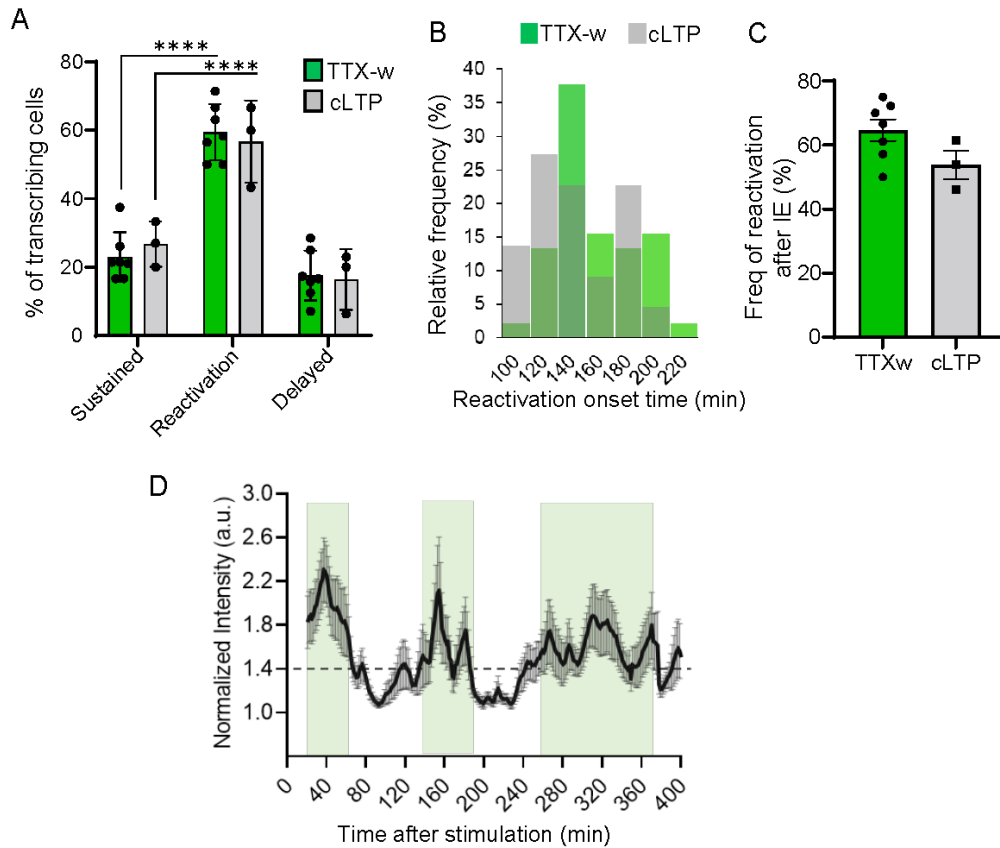

**Figure S1:**

**Transcriptional state of individual alleles reveals reactivation under different stimulation conditions, Related to Figure 1.** (A) Comparison of the different transcriptional states in the second cycle under two stimulation conditions (Reactivation vs sustained,  $p < 0.001$ , repeated measures one-way ANOVA,  $n = 92$  cells from 6 independent experiments in TTX-w,  $n = 34$  cells from 3 independent experiments in cLTP). (B) Frequency distribution of reactivation onset times ( $n = 45$  neurons, TTX-w;  $n = 22$  neurons, cLTP). (C) Reactivation probability after IE-activation under two stimulation conditions ( $n = 92$  neurons, 7 independent experiments in TTX-w,  $n = 34$  cells from 3 independent experiments in cLTP, each circle represents one experiment). (D) Long term transcription imaging after TTX-w from individual neurons indicates at least 3 cycles of transcription ( $n = 18$  neurons). Trace indicates time average of 6min. Error bars indicate SEM. \*\*\*\*  $p < 0.001$ .

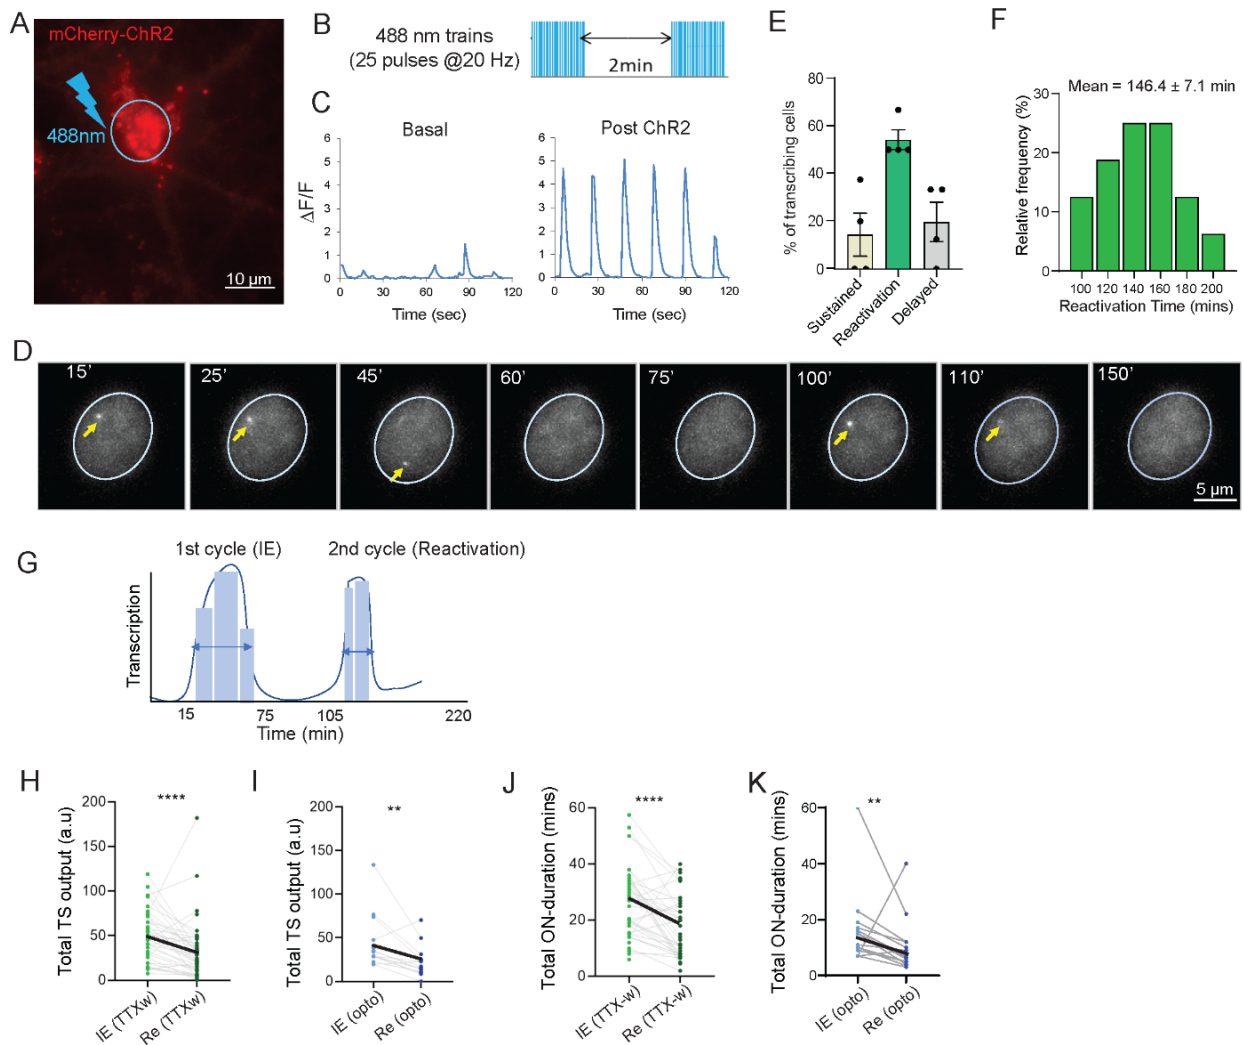

**Figure S2:**

**Optical trigger of *Arc* transcription and comparison of transcriptional output across cycles, Related to Figure 2.** (A) Hippocampal neurons from *Arc*<sup>P/P</sup> infected with lentiviruses expressing ChR2-mCherry and PCP-GFP. The soma of mCherry-neurons stimulated with trains of 488 nm light using a pinhole (blue circle). (B) Stimulation paradigm for triggering activity in individual neurons. (C) Nuclear Ca<sup>2+</sup> traces in basal and after optical stimulation. (D) Representative images showing transcription (yellow arrows) after optical trigger. Scale bar 10  $\mu$ m. (E) Percentage of cells displaying different transcriptional states in second cycle (n = 27 neurons from 4 experiments). (F) Histogram of reactivation onset times after optical stimulation of ChR2-expressing neurons. (G) Each transcriptional cycle can be composed of multiple bursts. The total ON-duration and the transcriptional output of all the bursts in the first cycle (IE; 15-75 min post stimulation), and the 2<sup>nd</sup> cycle (reactivation, Re; 105-200 min post stimulation) were calculated. (H-I) Pairwise comparison of total transcriptional output in the two cycles after TTX-w (H), and single neuron stimulation (opto) (I) (IE vs Re, p < 0.001 for TTX-w, p = 0.005 for Opto, paired t-test). (J-K) Pairwise comparison of duration of the ON-state of the gene in the two cycles (IE vs Re, p < 0.001 for TTX-w, p = 0.007 for Opto, paired t-test). Each dot represents a single allele. n = 40 cells for TTX-w, n = 13 cells for opto, \* p < 0.05, \*\* p < 0.01, \*\*\*\* p < 0.001.

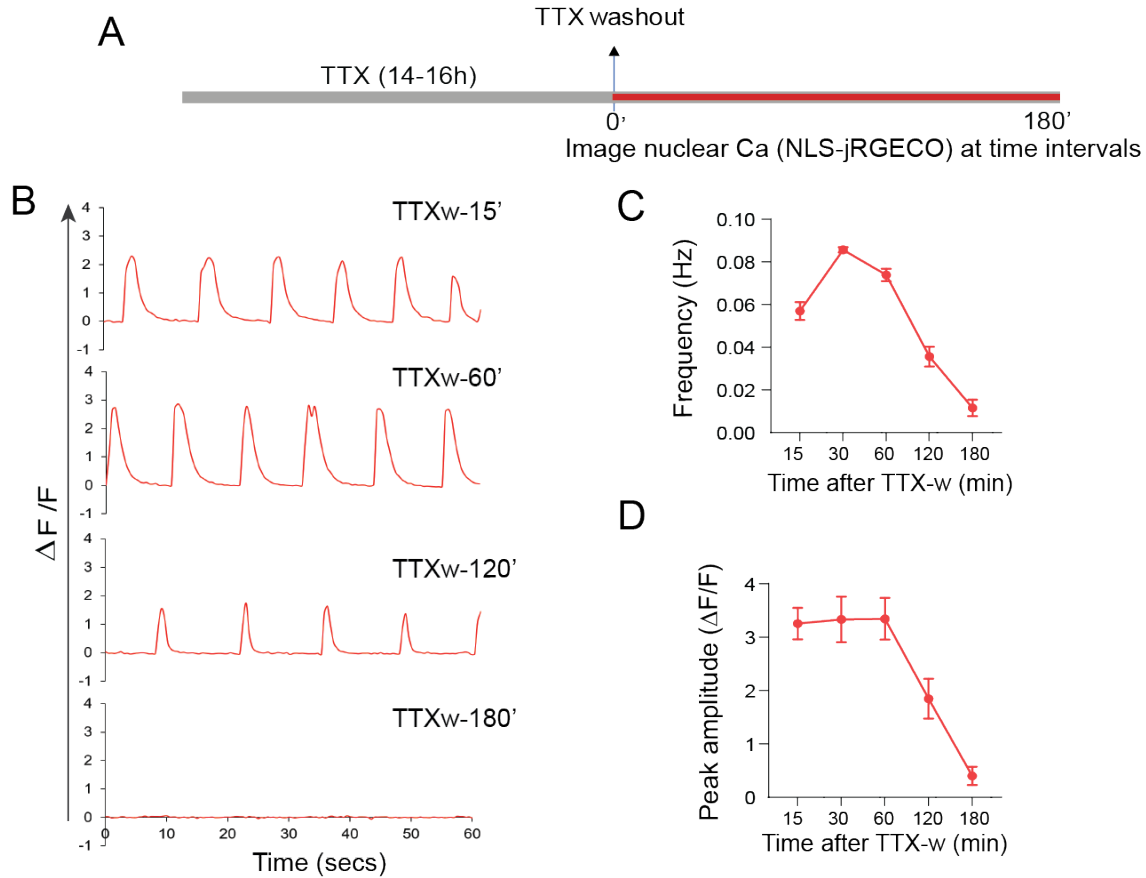

**Figure S3:**

**Nuclear calcium measurements over time, Related to Figure 3.** (A) Schematic of stimulation paradigm and measurements of nuclear  $\text{Ca}^{2+}$  levels using the red-shifted nuclear calcium indicator NLS-jRGECO1a. The same neurons were imaged at different time points after stimulation, where  $\text{Ca}^{2+}$  activity was recorded for 1 min at 1 Hz acquisition rate. (B) Traces of nuclear  $\text{Ca}^{2+}$  transients at different time points after TTX-w. (C) Graphs showing frequency of  $\text{Ca}^{2+}$  transients across time. (D) Graphs showing peak amplitude of  $\text{Ca}^{2+}$  transients across time.  $n = 43$  neurons from 3 independent experiments. Error bars indicate SEM.

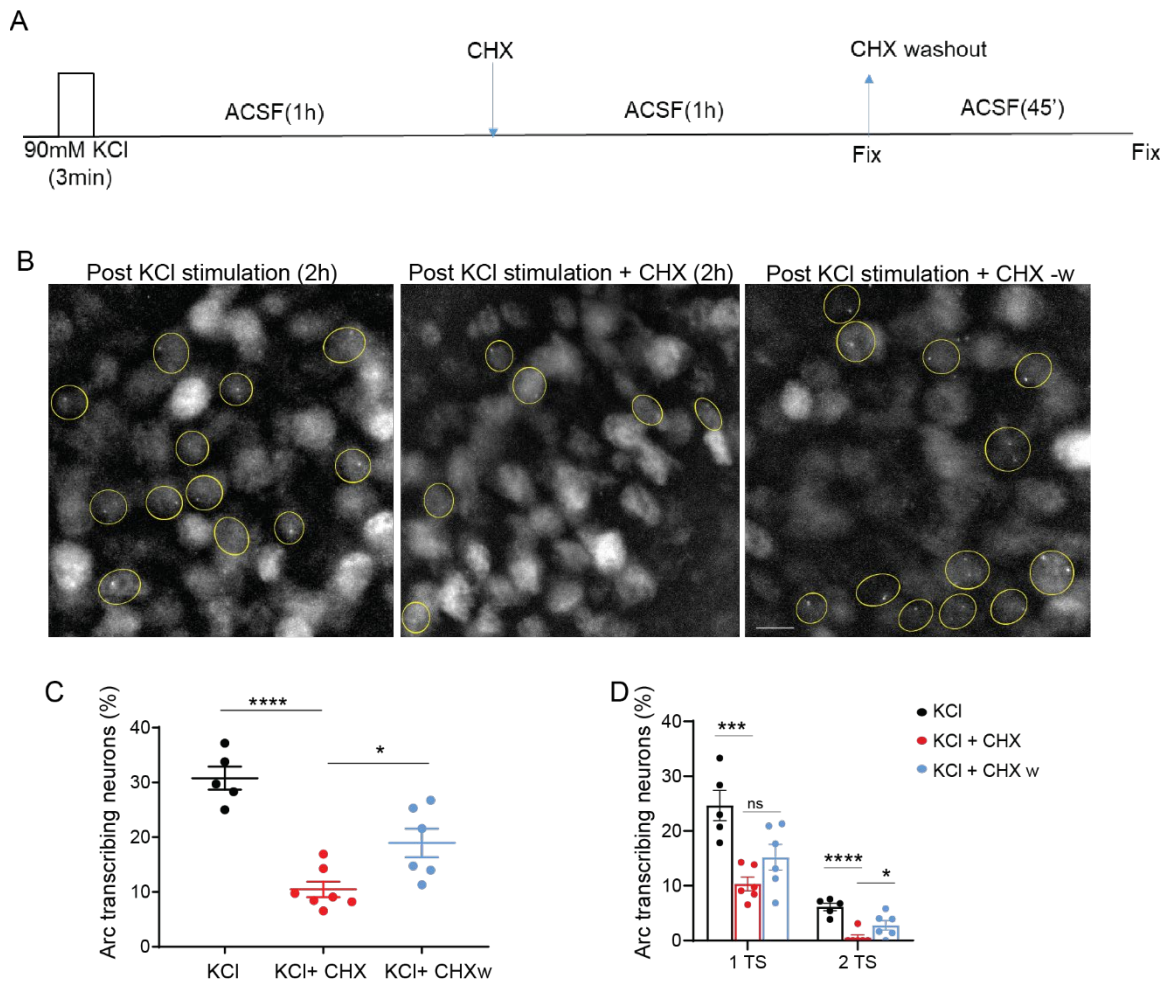

**Figure S4:**

**Protein synthesis-dependent transcriptional phase in the hippocampus, Related to Figure 4.**

(A) Schematic of stimulation paradigm, where a brief (3 min) depolarization with KCl was performed followed by washout, and incubation of slices in ACSF. Acute hippocampal slices from Arc<sup>P/P</sup> x PCP-GFP animals were used. Transcription was imaged *post hoc* after fixing the slices at different time points as shown. (B) Representative images of GC nuclei show distinct transcription sites at 2-hour post stimulation (*left panel*). Lack of transcribing cells with CHX incubation (*middle panel*) and restoration of transcription post CHX washout (*right panel*). Transcribing cells marked with yellow boundaries. (C) Percentage of transcribing neurons across different conditions (KCl vs KCl + CHX,  $p < 0.001$ ; KCl +CHX vs KCl + CHX-w,  $p = 0.016$ , one-way ANOVA). (D) Percentage of neurons exhibiting transcription from one or both alleles in different conditions. Note the loss of neurons with 2 TS after CHX addition. (KCl vs KCl + CHX,  $p = 0.002$  for 1TS,  $p < 0.001$  for 2TS, one-way ANOVA; KCl + CHX vs KCl + CHX-w,  $p = 0.3$  for 1TS,  $p = 0.04$  for 2 TS, one-way ANOVA). Error bars indicate SEM.  $n = 5$  slices from 3 animals. \*  $p < 0.05$ , \*\*  $p < 0.01$ , \*\*\*\*  $p < 0.001$ . Scale bar  $10\mu\text{m}$ .

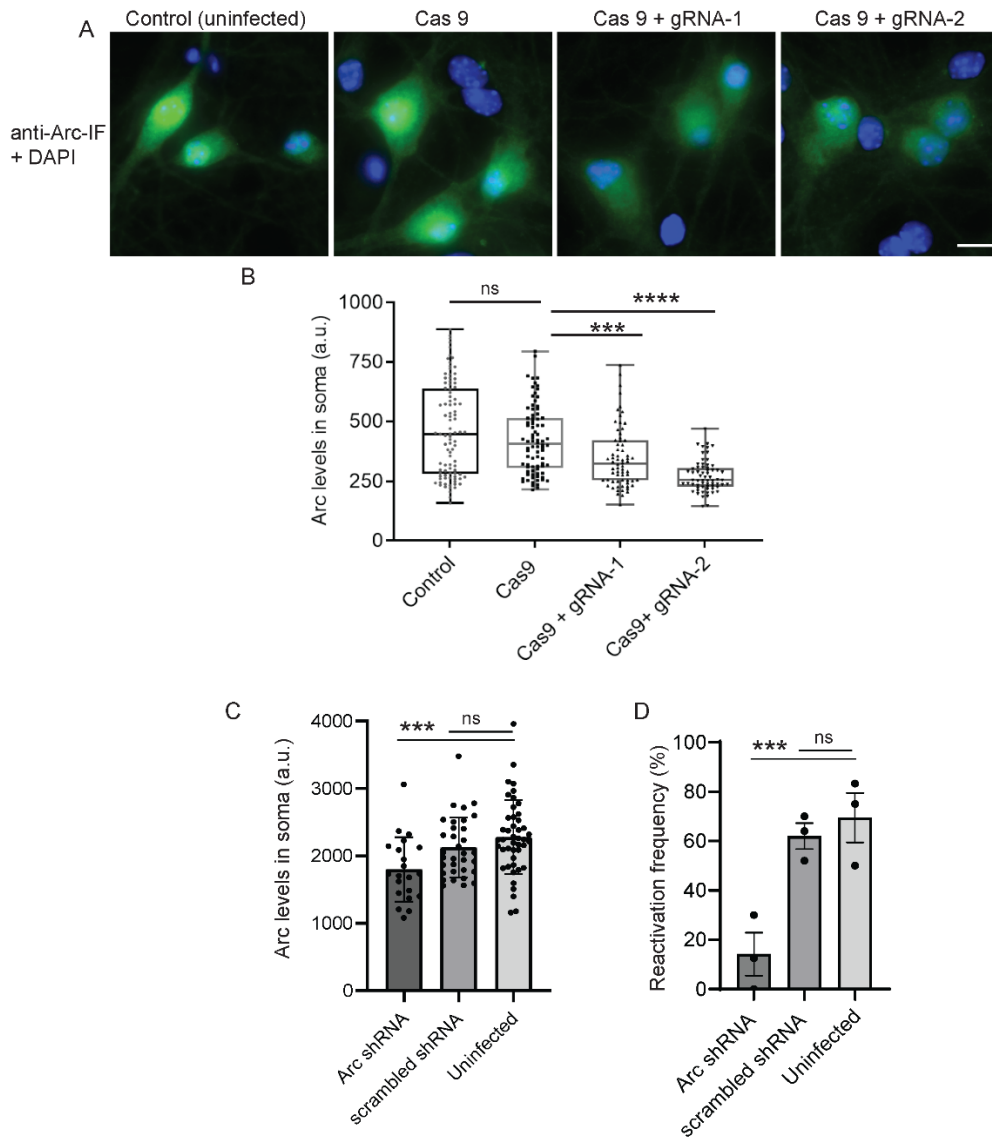

**Figure S5:**

**Arc protein knockdown and effect on reactivation, Related to Figure 4. (A)** Representative images showing Arc protein levels in the soma after stimulation (TTX-w 150 min) in uninfected controls, and with Cas9 infections. Two gRNAs were used. **(B)** Quantification of Arc levels in soma show KD of Arc protein with gRNAs (Cas9 vs Cas9 + gRNA-1,  $p = 0.002$ ; Cas9 vs Cas9 + gRNA-2,  $p < 0.0001$ ; uninfected control vs Cas9,  $p = 0.63$ ; one-way ANOVA). **(C)** Arc protein levels in control and infection with shRNAs against Arc and scrambled (Arc shRNA vs Uninfected,  $p = 0.001$ , scrambled vs uninfected,  $p = 0.47$ , one-way ANOVA;  $n = 21$  for Arc shRNA,  $n = 33$  for scrambled,  $n = 45$  neurons for uninfected controls). **(D)** Transcriptional reactivation frequency across conditions (Arc shRNA vs Uninfected,  $p = 0.003$ , scrambled vs uninfected,  $p = 0.55$ , one-way ANOVA,  $n = 3$  independent experiments). \*\*\* $p < 0.005$ ; \*\*\*\* $p < 0.001$ , \*\* $p < 0.01$ . Error bars are SEM. Scale bar  $10\mu\text{m}$ .

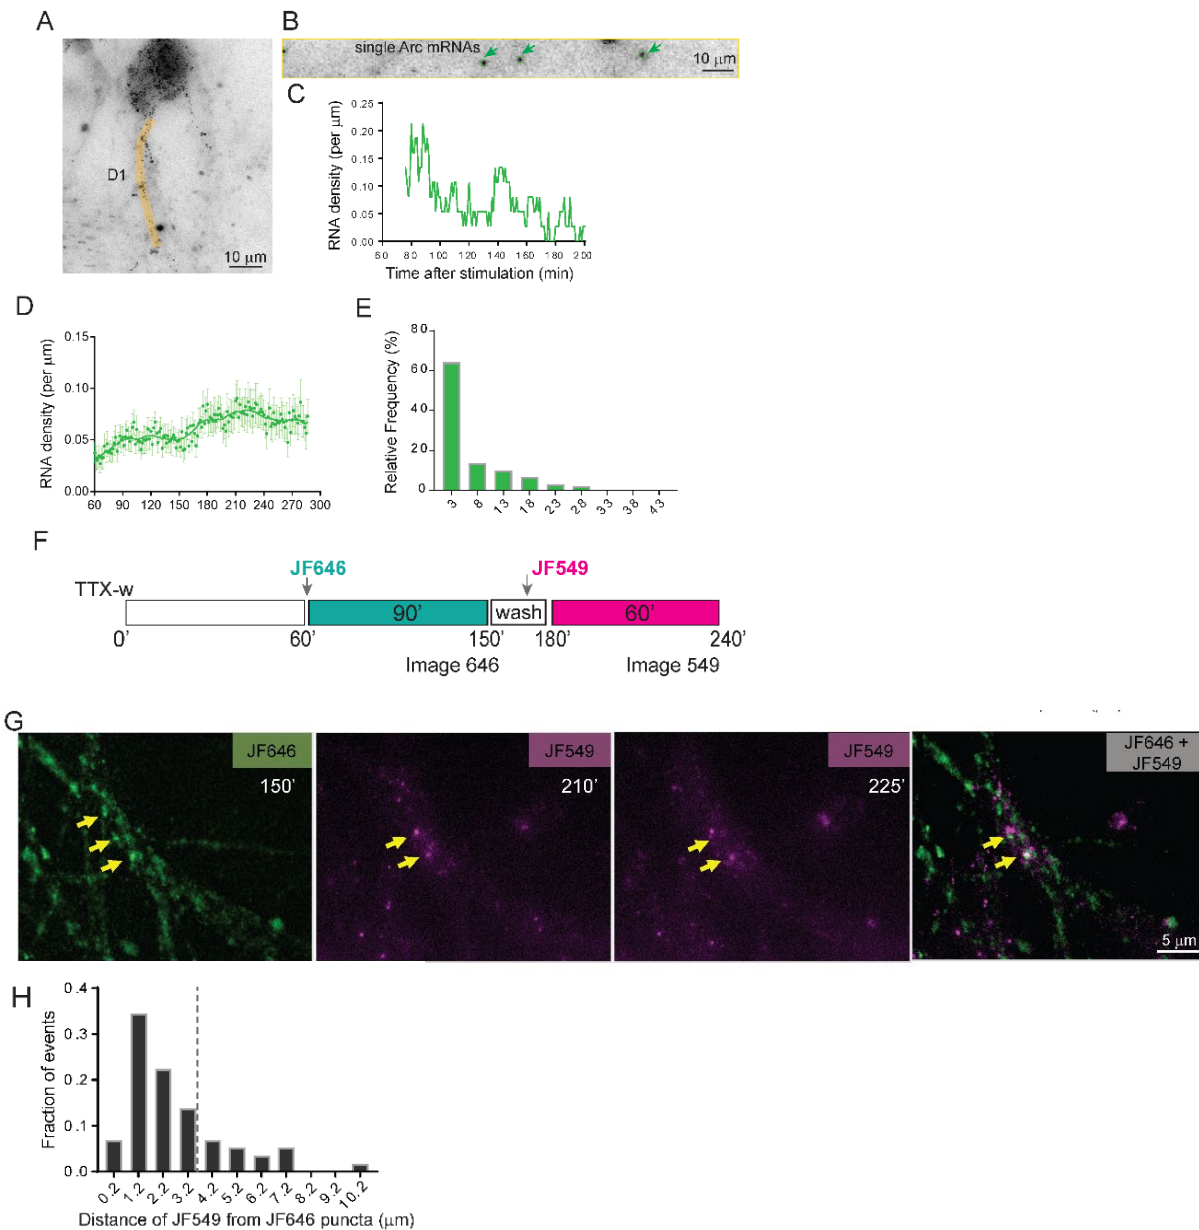

**Figure S6:**

**Long-term dynamics of *Arc* mRNAs and proteins in dendrites, Related to Figure 5. (A)**

Image of a neuron with *Arc* mRNAs in dendrites. Time lapse imaging of dendritic mRNAs performed for several hours after stimulation. **(B)** Image of a straightened dendrite (D1). Green arrows indicate single *Arc* mRNAs. **(C)** RNA density measured over time from the dendrite in (B). **(D)** Average mRNA density from multiple neurons shows two phases of RNA accumulation over time. Solid line indicates time averaging of 10 min. **(E)** Histogram of residence times of *Arc* mRNAs in the dendrites. **(F)** Labeling scheme to detect *Arc* proteins from early and late phases. **(G)** Representative images show JF646 and JF549 label in the same dendrite, and the overlay. Yellow arrows indicate co-localization or close proximity of JF646 and JF549 signal. **(H)** Histogram of distances between local maxima of JF646 puncta and the nearest JF549 puncta. Dashed line indicates the 75<sup>th</sup> percentile. Scale bar is 5  $\mu\text{m}$ .  $n = 14$  dendrites for mRNAs from 3 independent experiments;  $n = 10$  neurons for proteins from 2 independent experiments.

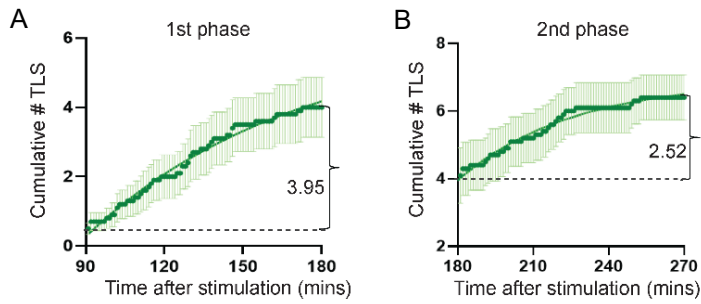

**Figure S7:**

**Arc translation output dynamics, Related to Figure 6. (A-B)** Cumulative number of Arc TLS in dendritic hotspots from first phase (90-180 min)(A), and second phase (180-270 min)(B). Data fitted to a single-phase association model and change from baseline shown by brackets.  $n = 20$  dendrites from 3 independent experiments.
